# Supplementary material
Source: PubMed Central journal article supplement (PMC7039648)
Supplement: NIHMS1058529-supplement-sb9b00285_si_001_pdf.pdf [file NIHMS1058529-supplement-sb9b00285_si_001_pdf.pdf]

## Supplementary Information

### Repurposing protein degradation for optogenetic modulation of protein activities

Payel Mondal<sup>†</sup>, Vishnu V. Krishnamurthy<sup>†</sup>, Savanna R. Sharum<sup>†</sup>, Neeka Haack<sup>†</sup>, Huiwen Zhou<sup>†</sup>, Jennifer Cheng<sup>†,‡</sup>, Jing Yang<sup>#</sup>, Kai Zhang<sup>†,‡,§,¶,\*</sup>

<sup>†</sup>*Department of Biochemistry, <sup>‡</sup>Center for Biophysics and Quantitative Biology, <sup>§</sup>Neuroscience Program, and <sup>¶</sup>Beckman Institute, University of Illinois at Urbana-Champaign, 600 South Mathews Avenue, Urbana, Illinois 61801, United States.*

<sup>#</sup>*Department of Comparative Biosciences, University of Illinois at Urbana-Champaign, 2001 S Lincoln Ave, Urbana, Illinois 61802, United States.*

<sup>‡</sup> *Current address: Feinberg School of Medicine, Northwestern University, Ward 9-250, 303 E Chicago Ave, Chicago, Illinois 60611, United States.*

#### Corresponding Author

\* Kai Zhang, [kaizkaiz@illinois.edu](mailto:kaizkaiz@illinois.edu)

## Supplementary Methods

### Supplementary Figures

**Figure S1.** Degron functions normally with the fusion protein HA-MKP3.

**Figure S2.** Absence of LEXY shows increased stabilization of MKP3 and reduced PC12 differentiation ratio in the dark.

**Figure S3.** Absence of eLOV in MKP3-tevS-deg abolishes light-dark contrast for MKP3-reduced PC12 cell differentiation.

**Figure S4.** The total amount of proteins remains consistent between light-stimulated sample and the dark control upon inhibition of new protein synthesis with cycloheximide.

**Figure S5.** Light illumination for 30 min in PC12 cells transfected with GLIMPSe-CA MEK is sufficient to induce significant neurite outgrowth.

**Figure S6.** Absence of eLOV in CA MEK-tevS-deg abolishes light-dark contrast for PC12 cell differentiation.

**Figure S7.** Long-term light exposure does not cause cell death.

**Figure S8.** DNA and amino acid sequences of GLIMPSe.

## Supplementary Methods

### Reagents

Phusion DNA polymerase master mix (M0530L) was purchased from NEB. In-Fusion HD Cloning Plus kit was from Takara (638909). DreamTaq PCR Master Mix (2x) (K1081), Turbofect (R0532) and Pierce Protease and Phosphatase Inhibitor Mini Tablets (A32959), F12K (21127-022) medium, and horse serum (26050088) were from Thermo Fisher Scientific. Fetal bovine serum (F1051), RIPA Lysis Buffer, 10x (20-188) was from Millipore Sigma. PBS (21-040-CV), DMEM (10-017-CV), Penicillin-streptomycin solution (30-002-CI), Trypsin EDTA (0.25% Trypsin, 0.1% EDTA) 1x (25-053-CI) was from Corning. Precast protein gels (456-1024) and ECL substrate (170-5060) were from Bio-Rad. Antibodies used in this work are Phospho-p44/42 MAPK (Erk1/2) (Thr202/Tyr204) (Cell Signaling Technology, 9101S, 1:1000), p44/42 MAPK (Erk1/2) (Cell Signaling Technology, #9102S, 1:1000), HA-Tag (C29F4) (Cell Signaling Technology, #3724S, 1:1000), GAPDH (14C10) (Cell Signaling Technology, #2118S, 1:1000) and Anti-rabbit IgG, HRP-linked Antibody (Cell Signaling Technology, 7074S, 1:2000).

### Plasmid construction

Constitutive active MEK (S218D, S222D) was constructed by site-directed mutagenesis. Evolved LOV (eLOV) was amplified from a synthetic gBlock from IDT based on a sequence from the previous work<sup>24</sup>. The sequence of LEXY was amplified from NLS-mCherry-LEXY (Addgene, catalog #72655). The full sequence of GLIMPSe was shown in Figure S8.

### Cell culture and transfection

HEK293T cells were cultured in DMEM supplemented with 10% fetal bovine serum and penicillin-streptomycin. PC12 cells were cultured in F12K medium supplemented with 15% horse serum and 2.5% FBS. All cell cultures were maintained in a standard incubator at 37 °C with 5% CO<sub>2</sub>. HEK293T and PC12 cells were seeded in 12 well plates, and cells were transfected once they reached 60% - 80% confluency. Transfection was performed using Turbofect transfection reagent following the vendor's instruction. For light-induced stabilization of MKP3 experiments, 100 ng CA MEK-EGFP, 200 ng EGFP-p2A-MKP3-eLOVtevS-deg and 700 ng of NLS-mCherry-TEV-LEXY plasmid were cotransfected in PC12 cells. For light-induced CA MEK stabilization experiments 50 ng of EGFP-p2A-CA MEK-eLOVtevS-deg and 950 ng of NLS-mCherry-TEV-LEXY plasmid was cotransfected in PC12 cells. After 3 hours of transfection, transfection medium was replaced with growth medium (F12K + 15% horse serum + 2.5% FBS). After overnight recovery, the cell culture was exchanged to a low-serum medium (1.5% horse serum + 0.025% FBS) for another 24 hours to reduce the base-level ERK activity.

### Western Blot

After transfection, recovery, and starvation, cells were harvested and lysed with a mixture of RIPA buffer and protease/phosphatase inhibitor cocktail. Lysates were centrifuged, and supernatants were mixed with NuPAGE™ LDS Sample Buffer and β-Mercaptoethanol. Samples were subjected to SDS-PAGE on a precast gel, followed by overnight transfer to PVDF membrane. Two different blots were run using the same cell lysate to probe the phospho-ERK and pan ERK, respectively.

### Construction of a programmable LED device

For both long-term and short-term light illumination, the LED array was constructed by assembling a 6-by-4 blue LED array with 24 blue LEDs (B4304H96, Linrose Electronics) on a breadboard. LED intensity can be continuously tuned through a tunable voltage and a current-limiting resistor.

The breadboard was hosted in an aluminum box, and a light diffuser film was positioned above the LED array to make the light intensity homogeneous in the defined area. The light intensity at the cell culture plate was measured by a power meter (PM100D, S121C, Thorlabs).

### **Statistical analysis**

The p-values were determined by performing two-tailed, unpaired t-test, or one-way ANOVA test using the GraphPad Prism software.

Supplementary Figure 1

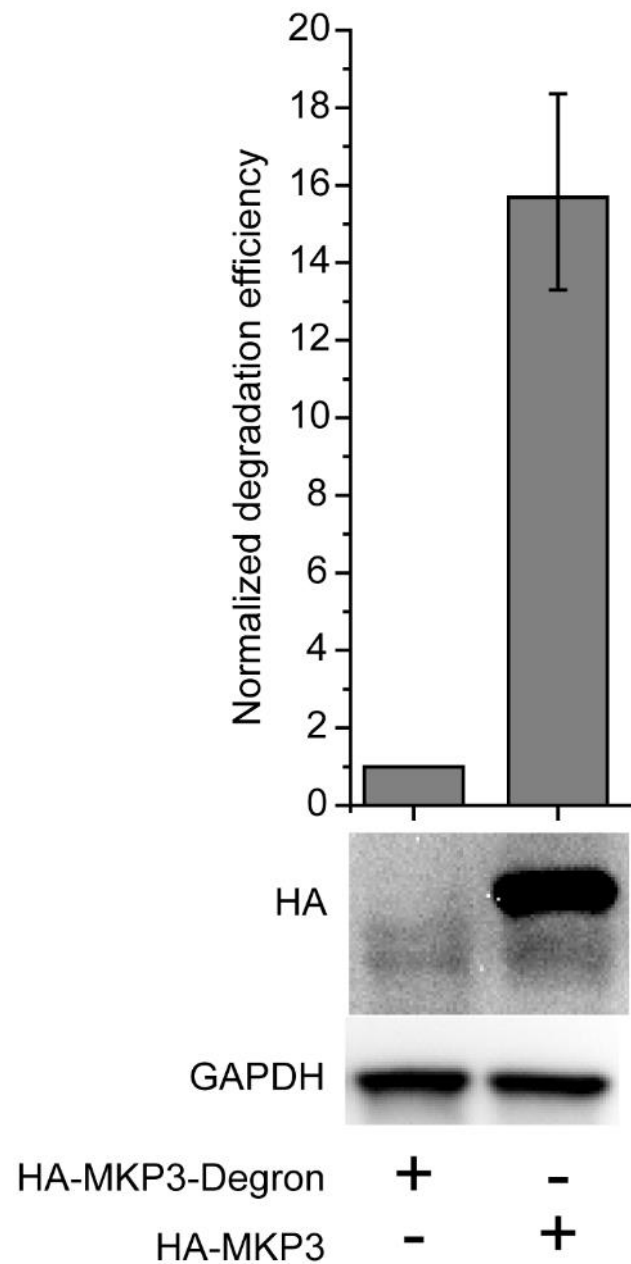

**Figure S1. Degron functions normally with the fusion protein HA-MKP3.** In PC12 cells, the fusion of degrons at the C-terminus of HA-MKP3 resulted in a 15.7-fold reduction of protein level compared to HA-MKP3 assayed by Western blot analysis with anti-HA antibody. Values were presented by mean  $\pm$  SD (n=2).

Supplementary Figure 2

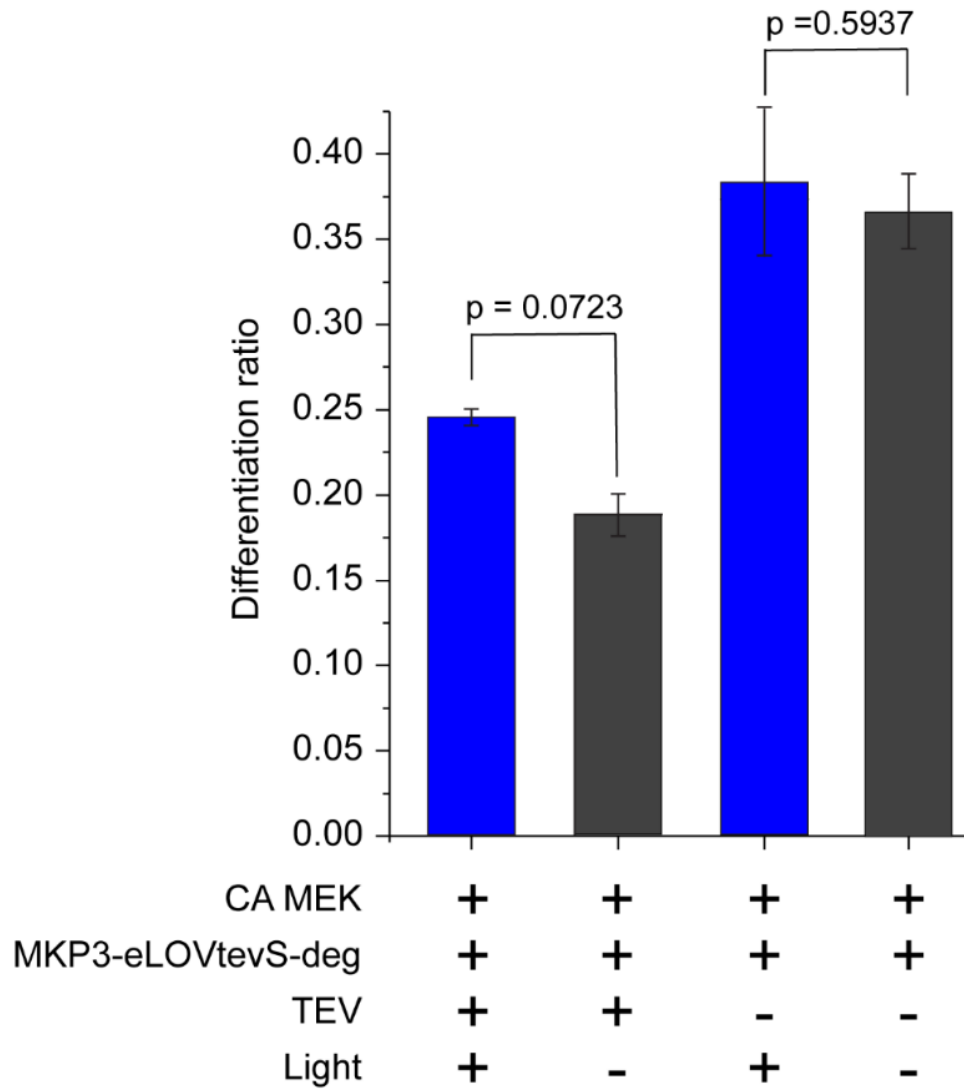

**Figure S2. Absence of LEXY shows increased stabilization of MKP3 and reduced PC12 differentiation ratio in the dark.** Differentiation ratio calculated for PC12 cells transfected with CA MEK-EGFP, EGFP-p2A-MKP3-eLOVtevS-3X degron, and TEV-mRuby2. Cells were illuminated with 0.5 mW/cm<sup>2</sup> blue light or kept in the dark for 45 h before imaging. Values represent the mean  $\pm$  SD of two biological replicates (n = 2) with more than 150 cells counted per replicate. Differentiation ratio= (# of transfected + differentiated cells) / # of transfected cells.

Supplementary Figure 3

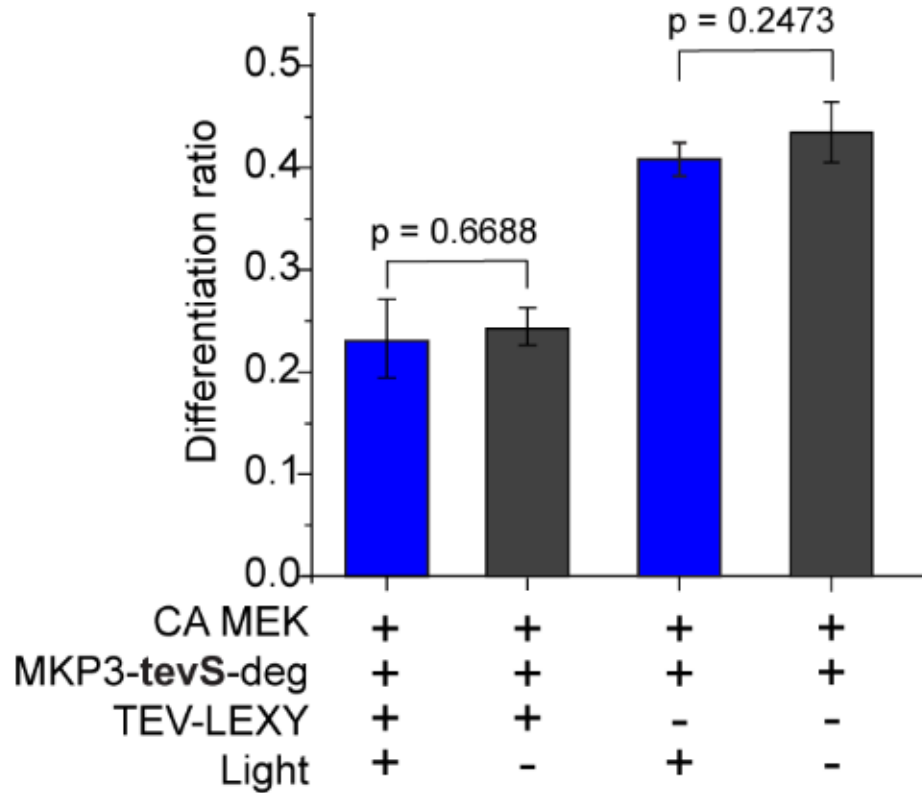

**Figure S3. Absence of eLOV in MKP3-tevS-deg abolishes light-dark contrast for MKP3-reduced PC12 cell differentiation.** Differentiation ratio calculated for PC12 cells transfected with CA MEK-EGFP, mRuby2-p2A-MKP3-tevS-3X degron, and NLS-mCherry-TEV-LEXY. Cells were illuminated with 0.5 mW/cm<sup>2</sup> blue light or kept in the dark for 45 h before imaging. Values represent the mean  $\pm$  SD of two biological replicates (n = 2) with more than 150 cells counted per replicate. Differentiation ratio= (# of transfected + differentiated cells) / # of transfected cells.

### Supplementary Figure 4

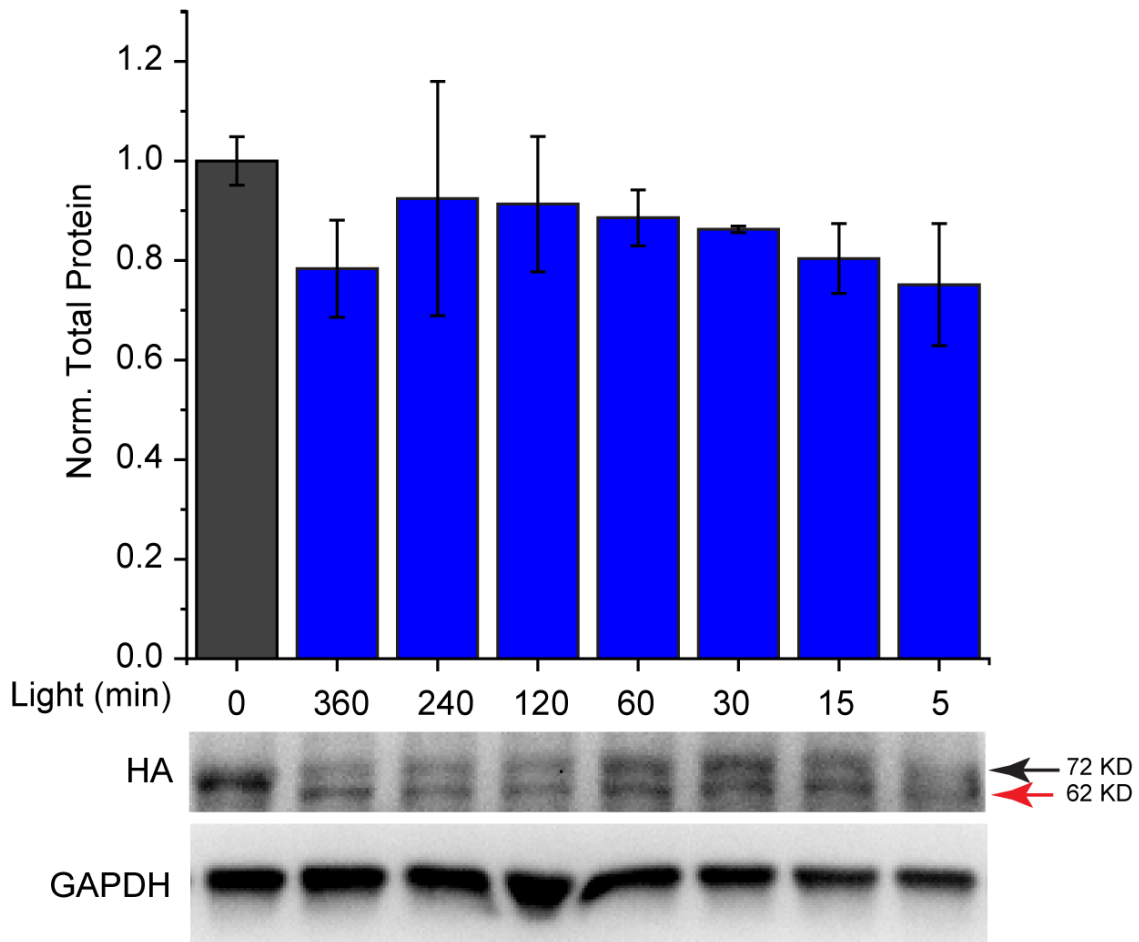

**Figure S4. The total amount of proteins remains consistent between the light-stimulated sample and the dark control upon inhibition of new protein synthesis with cycloheximide.** PC12 cells transfected with CA MEK-EGFP, EGFP-p2A-HA-MKP3-eLOVtevS-3X degron, and NLS-mCherry-TEV-LEXY were treated with 100 ng/ $\mu$ L cycloheximide, a translation inhibitor, 24 h after transfection. Cells were incubated in cycloheximide for 18 h followed by light exposure for different time intervals. The total amount of HA-tagged protein remained consistent across different conditions as new protein synthesis was blocked.

Supplementary Figure 5

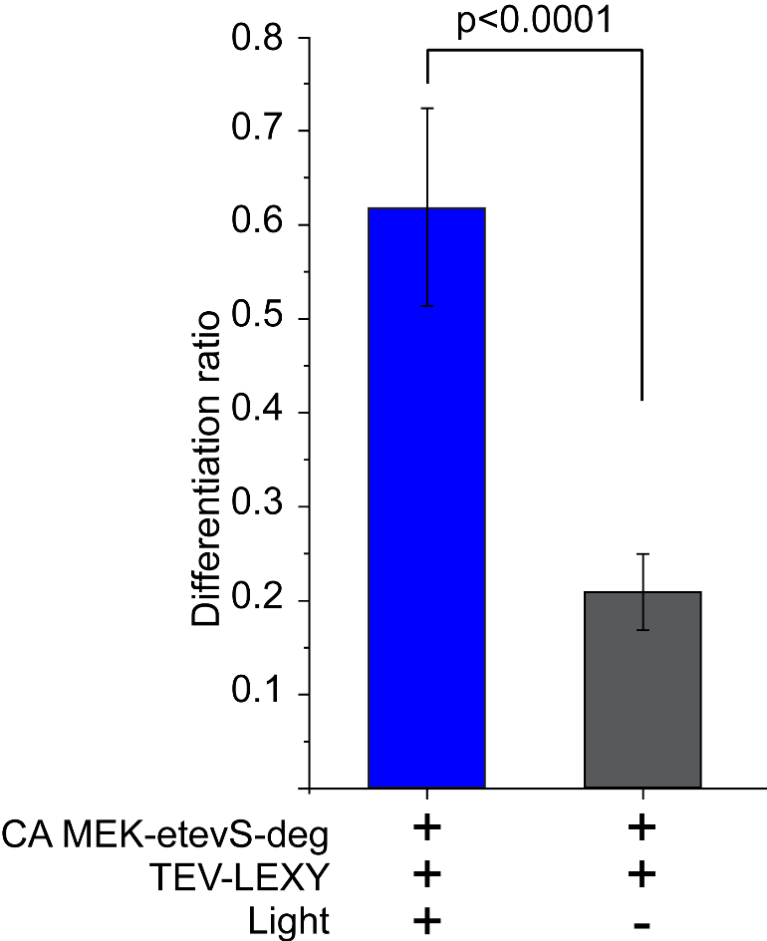

**Figure S5. Light illumination for 30 min in PC12 cells transfected with GLIMPSe-CA MEK is sufficient to induce significant neurite outgrowth.** CA-MEK rescued by 30 min light treatment shows a differentiation ratio of 0.6 compared with 0.2 for the dark control. The bar graph is presented with mean  $\pm$  SD averaged over three biological replicates ( $n = 3$ ) with more than 200 cells counted per replicate.



Supplementary Figure 6

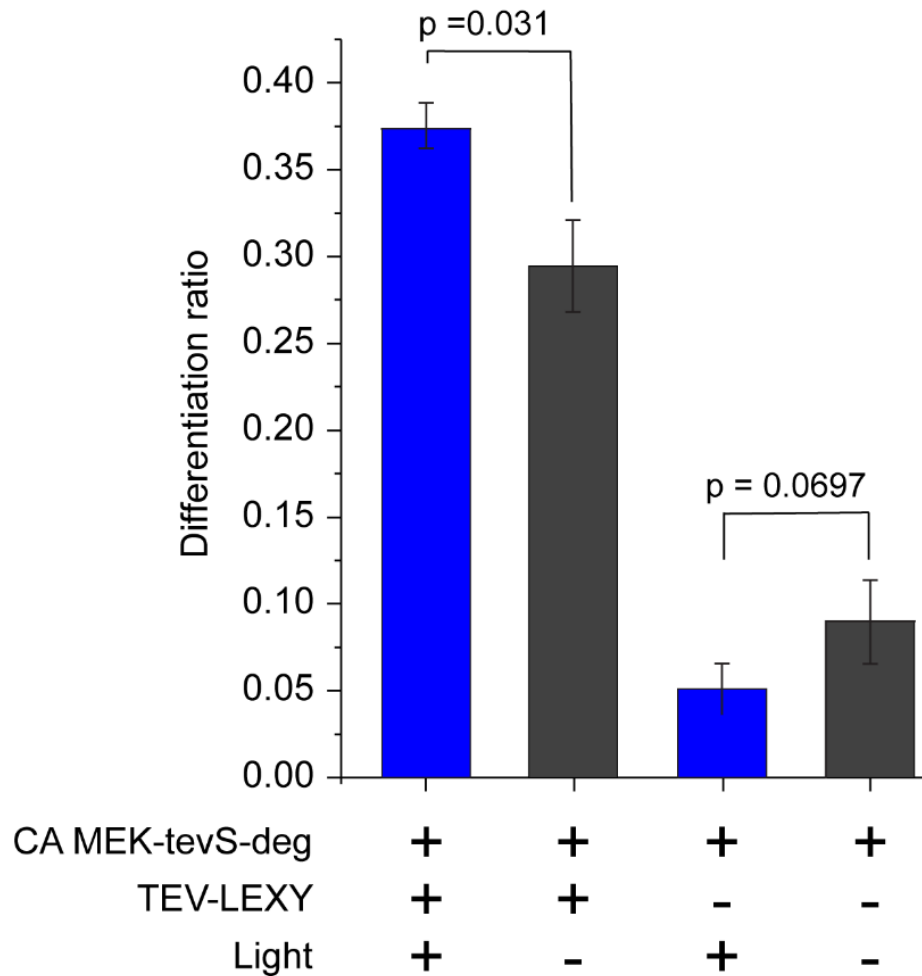

**Figure S6. Absence of eLOV in CA MEK-tevS-deg abolishes light-dark contrast for PC12 cell differentiation.** Differentiation ratio calculated for PC12 cells transfected with mRuby2-p2A-CA MEK-tevS-3X degron and NLS-mCherry-TEV-LEXY. Cells were illuminated with 0.5 mW/cm<sup>2</sup> blue light or kept in the dark for 45 h before imaging. Values represent the mean  $\pm$  SD of three biological replicates (n = 3) with more than 100 cells counted per replicate. Differentiation ratio = (# of transfected + differentiated cells) / # of transfected cells



## Supplementary Figure 8

1 TCTAGGGCTACTACACTTGAACGTATTGAGAAGAGTTTTGTCATTACTGACCCAAGATTG  
 1 S R A T T L E R I E K S F V I T D P R L  
 61 CCAGATAATCCATTATATTCGTTTCCGATAGTTTCTTGCAGTTGACAGAATATAGCCGT  
 21 P D N P I I F V S D S F L Q L T E Y S R  
 121 GAAGAAATTTGGGAAGAACTGCAGGTTTCTACAAGGTCCTGAAACTGATCGCGGACA  
 41 E E I L G R N C R F L Q G P E T D R A T  
 181 GTGAGAAAAATTAGAGATGCCATAGATAACCAAACAGAGGTCCTGTTTCTGAGCTGATTAAT  
 61 V R K I R D A I D N Q T E V T V Q L I N  
 241 TATACAAAGAGTGGTAAAAAGTTCTGGAACCTCTTTCAGTTGCAGCCTATGCGAGATCAG  
 81 Y T K S G K K F W N L F H L Q P M R D Q  
 301 AAGGGAGATGTCCAGTACTTTATTGGGGTTCAGTTGGATGGAAGTGCAGAGGGTCCGAGAT  
 101 K G D V Q Y F I G V Q L D G T E R V R D  
 361 GCTGCCGAGAGAGAGGCTGTCTGCTGGTTAAGAAAAGTGCAGAAGAAATTTGATGAGGCC  
 121 A A E R E A V M L V K K T A E E I D E A  
 421 GCAAAA gagaacctgtacttccagatg GGTGGAGGCTCTGGTAGA CTCTATGAATTTAGG  
 141 A K E N L Y F Q M G G G S G R L Y E F R  
 481 TTGATGATGACCTTCTCCGGGCTCAATCGCGGTTTTGCATACGCACGG TACAGTGGATCC  
 161 L M M T F S G L N R G F A Y A R Y S G S  
 541 GCTAGCGGTAGACTCTATGAGTTTACTGATGATGACATTCTCTGGACTTAACAGAGGG  
 181 A S G R L Y E F R L M M T F S G L N R G  
 601 TTCGCCTATGCCCGATATTCTGGATCCGGTAGGCTTTATGAGTTTCGCCTGATGATGACA  
 201 F A Y A R Y S G S G R L Y E F R L M M T  
 661 TTTTCCGGGTGAAACAGGGGCTTCGCTTATGCTCGCTACTCA tag  
 221 F S G L N R G F A Y A R Y S \*

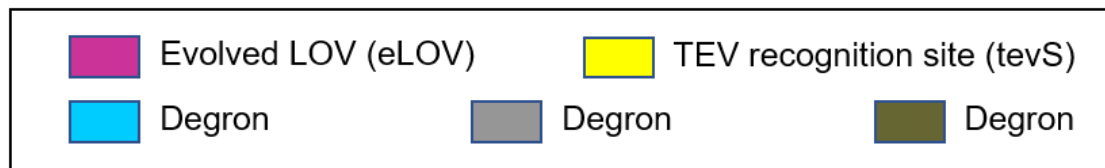

**Figure S8. DNA and amino acid sequences of GLIMPSe.** The domain of evolved LOV domain, tevS, and three codon-optimized degron are marked in distinct colors. The protein of target (e.g., MKP3 and CA MEK) were fused at the N-terminus of GLIMPSe.
